# Supplementary figures and images for: TSLP Protects Corneas From Pseudomonas aeruginosa Infection by Regulating Dendritic Cells and IL-23-IL-17 Pathway
Source: PubMed Central journal article supplement — Invest Ophthalmol Vis Sci. 2018 Aug;59(10):4228–37. doi: 10.1167/iovs.18-24672 (PMC6103385; doi:10.1167/iovs.18-24672), 2018-08

# 5 corneas per group

1 dpi

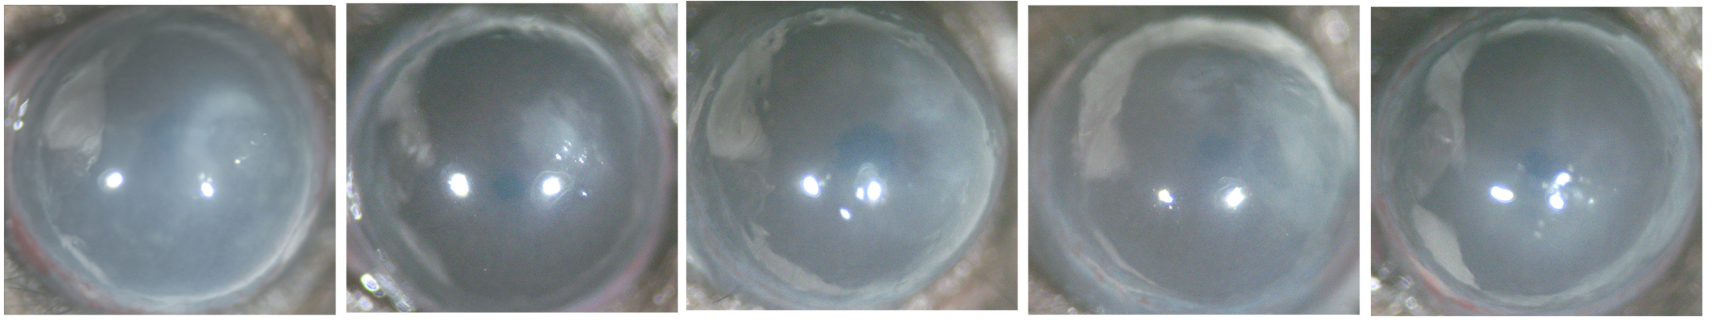

2dpi

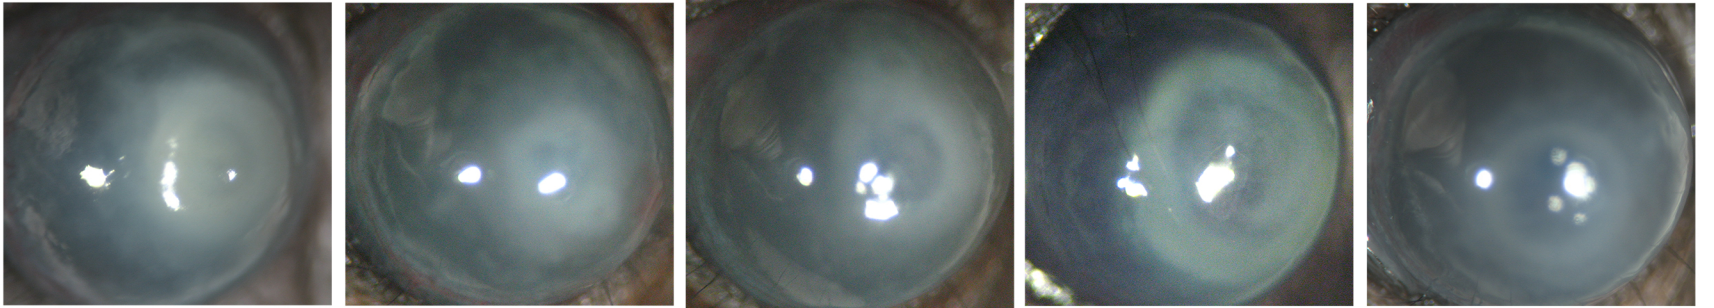

3 dpi

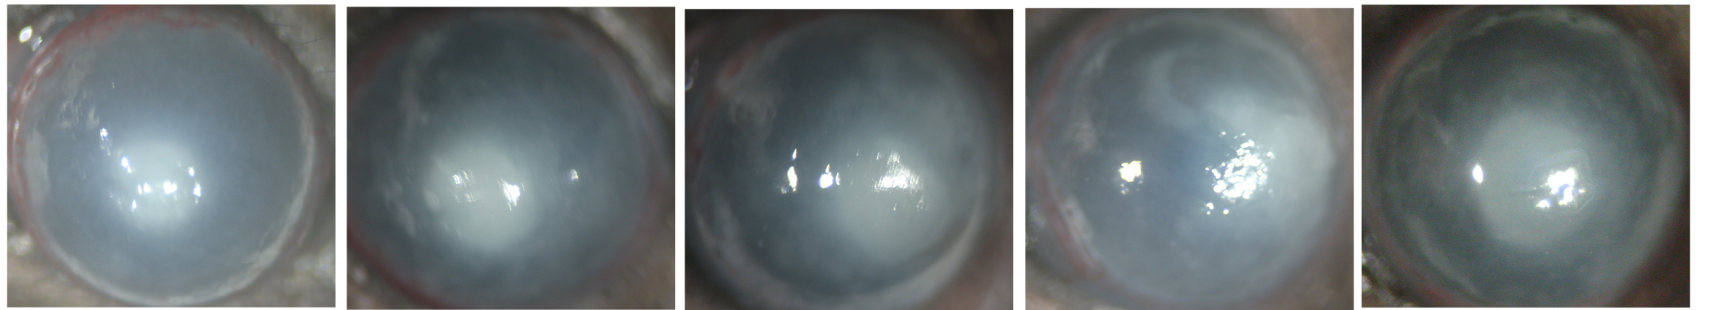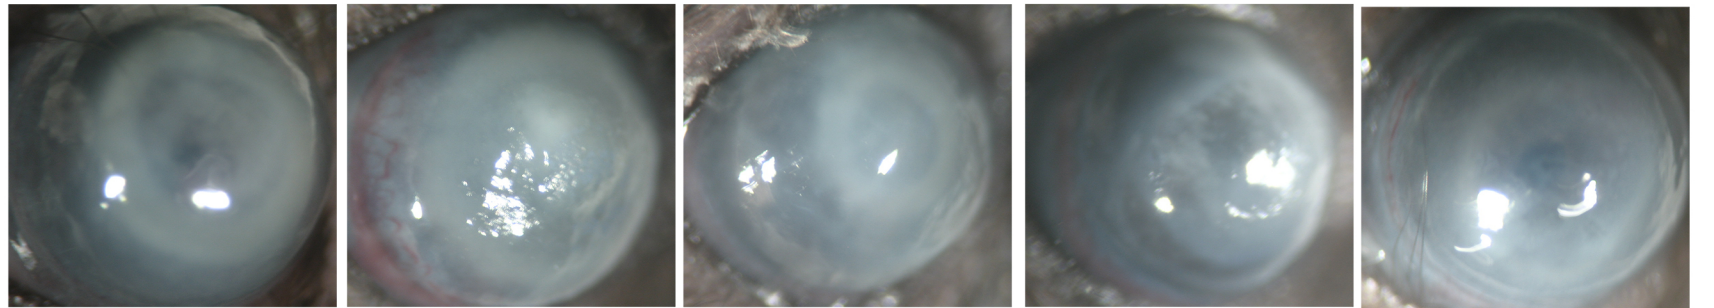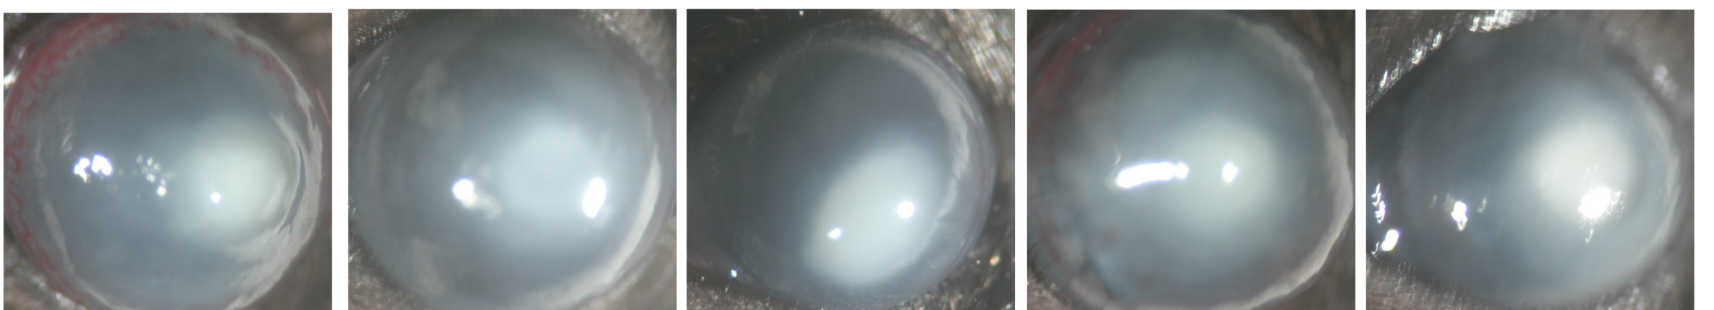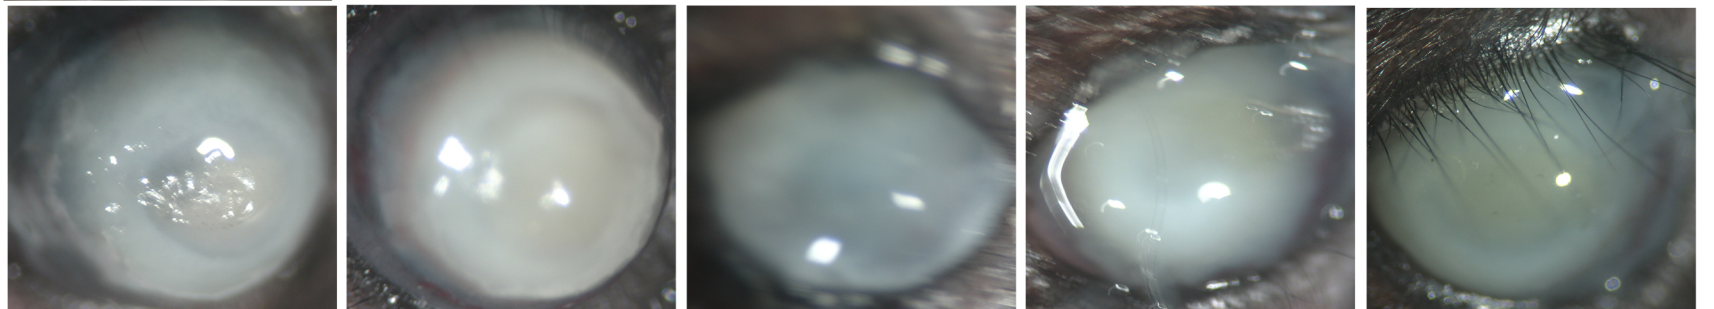

Anti-TSLPR Control Anti-TSLPR Control Anti-TSLPR Control

Supplement: iovs-59-10-16_s01.pdf [file iovs-59-10-16_s01.pdf]
